# Supplementary material for: Cellular FLICE-Inhibitory Protein Down-regulation Contributes to Celecoxib-Induced Apoptosis in Human Lung Cancer Cells
Source: Oxford University Press journal article supplement (doi:10.1158/0008-5472.can-06-2471), 2006-12-01
Supplement: 00085472can062471-sup-supplementary_fig_ure_1s.pdf [file 00085472can062471-sup-supplementary_fig_ure_1s.pdf]

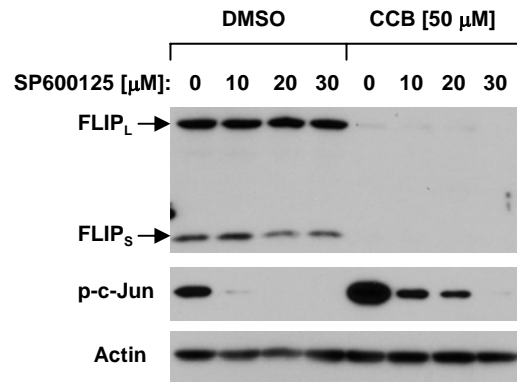

**Fig. 1S. The JNK inhibitor SP600125 does not inhibit c-FLIP downregulation induced by celecoxib.** H157 cells were pretreated with the indicated concentrations of SP600125 for 30 min and then co-treated with 50 mM celecoxib (CCB) for 7 h. Whole-cell protein lysates were then prepared for detection of the given proteins using Western blot analysis with actin serving as the loading control.
